# Supplementary material for: Analysis of Arbuscular Mycorrhizal Fungal Inoculant Benchmarks
Source: MDPI journal article supplement (doi:10.3390/microorganisms9010081), 2020-12-31
Supplement: s1 [file s1]

## Supplementary Materials

**Figure S1:** Physical forms of the commercial mycorrhizal inoculants,

**Figure S2:** Breakdown of the commercial mycorrhizal inoculants by species composition (A); number of species per product (B); and active ingredients contained in formulations (C).

**Figure S3:** Each circle represents a different product and is positioned according to 3 characteristics: total mycorrhiza concentration in the product (propagules per gram), forms (liquid, powder or granular) and number of different mycorrhiza strains contained. Product names were not shown due to the space limitation.

**Figure S4:** Evolution of mycorrhizal producing and marketing firm in Europe from 2010 to 2017.

**Table S1:** Raw data of AMF-based inoculants used in the study.

**Table S2:** Effect of Commercial Inoculants in Greenhouse and Field trials.

**Supporting Figure S1**

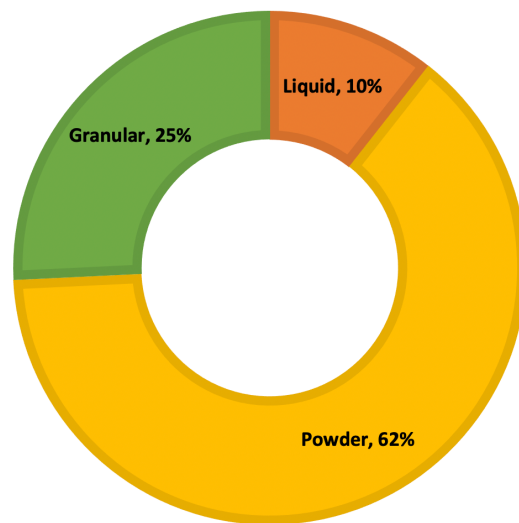

**Supporting Figure S1.** Physical forms of the commercial mycorrhizal inoculants.

## Supporting Figure S2

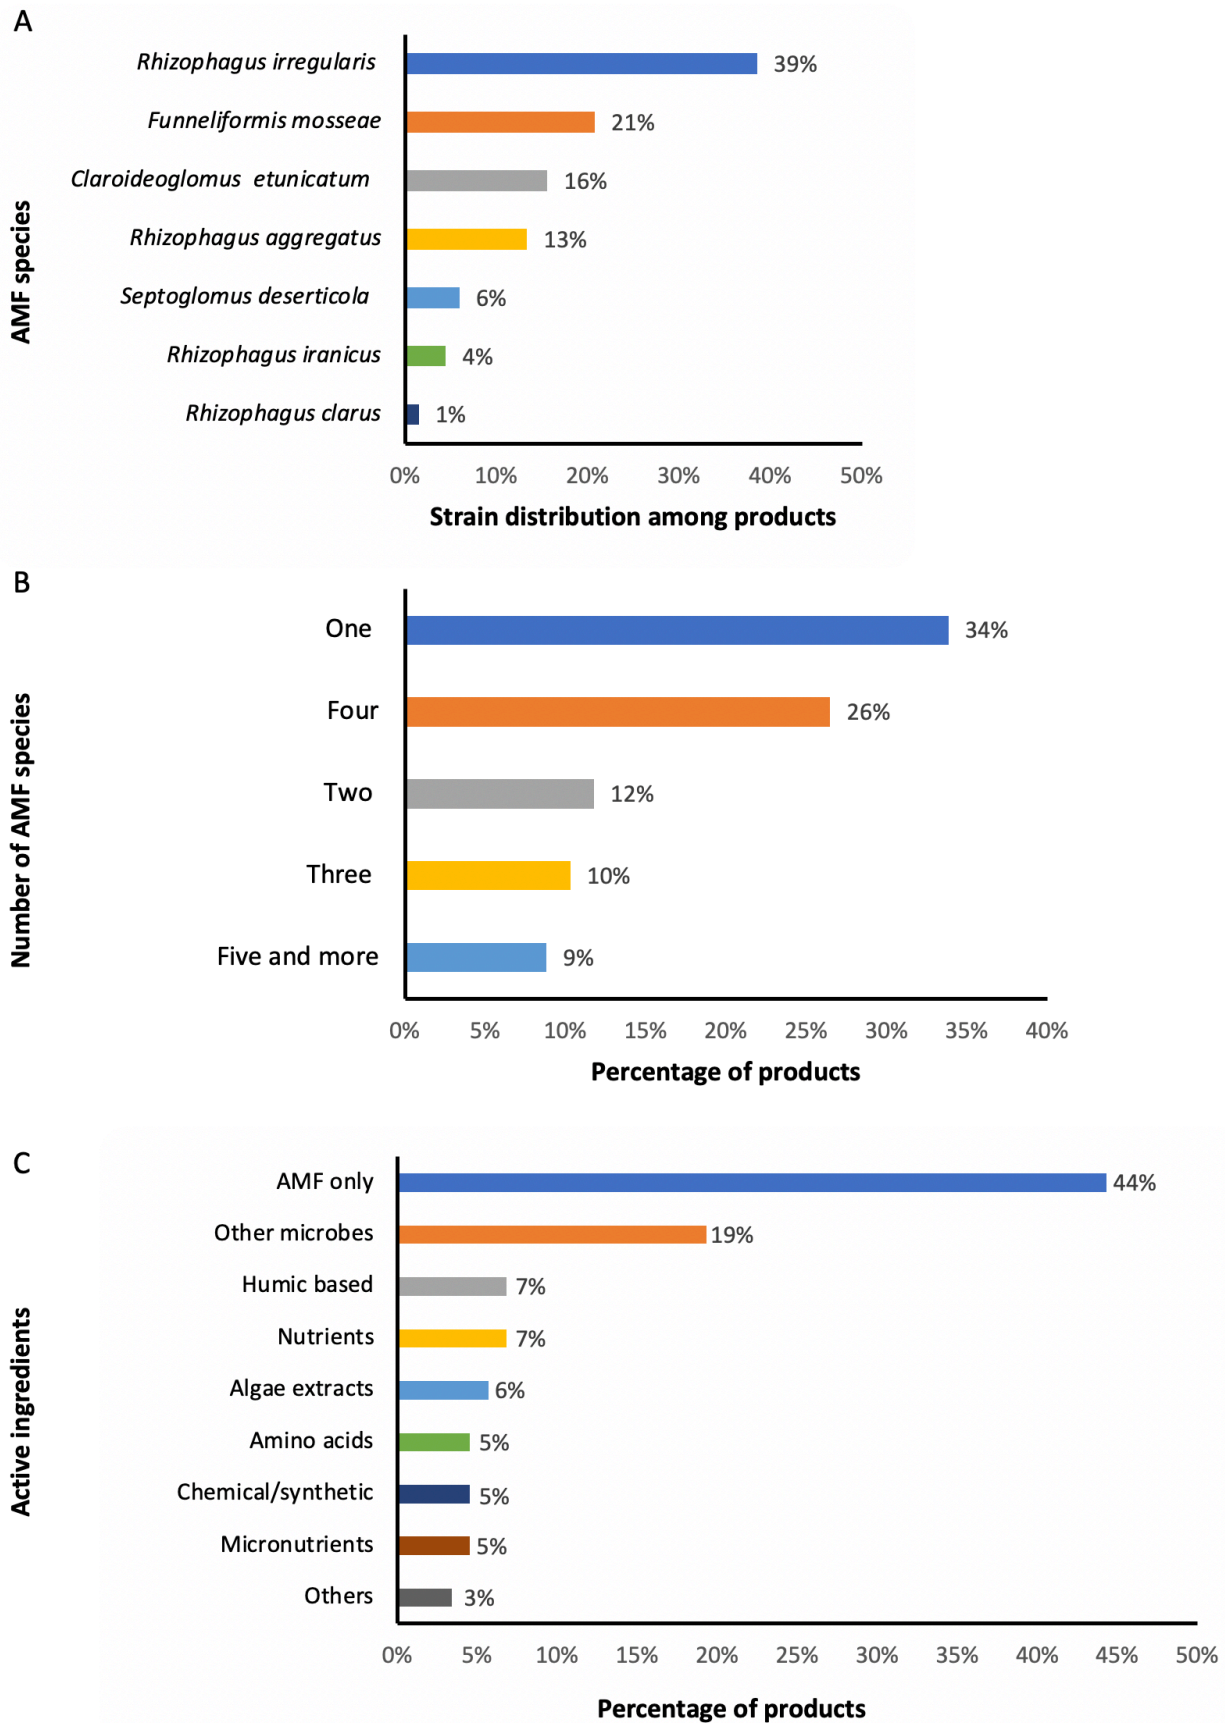

**Supporting Figure S2.** Breakdown of the commercial mycorrhizal inoculants by species composition (A); number of species per product (B); and active ingredients contained in formulations (C).

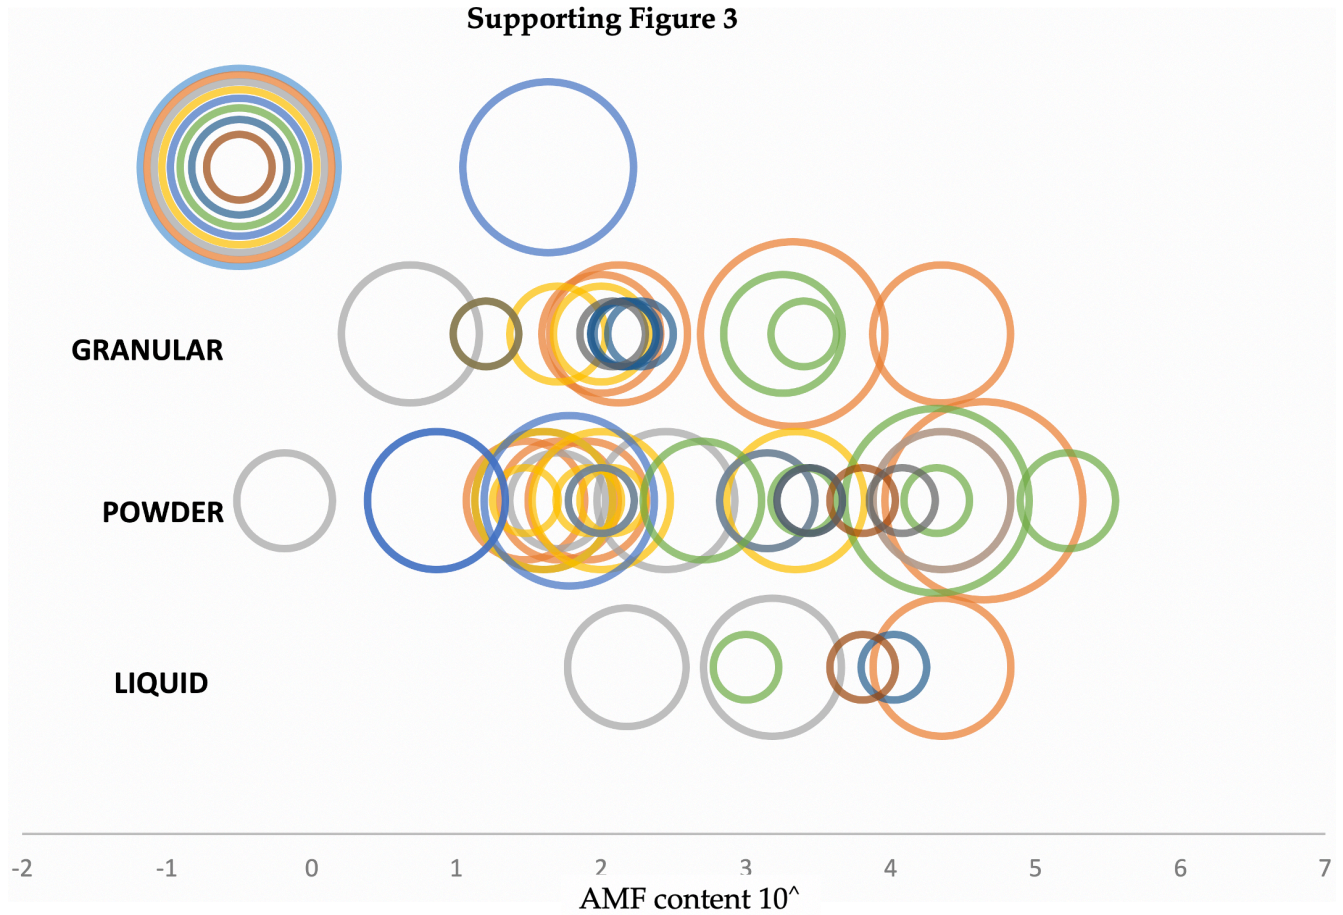

**Supporting Figure S3.** Each circle represents a different product and is positioned according to 3 characteristics: total mycorrhiza concentration in the product (propagules per gram), forms (liquid, powder or granular) and number of different mycorrhiza strains contained. Product names were not shown due to the space limitation.

**Supporting Figure 4**

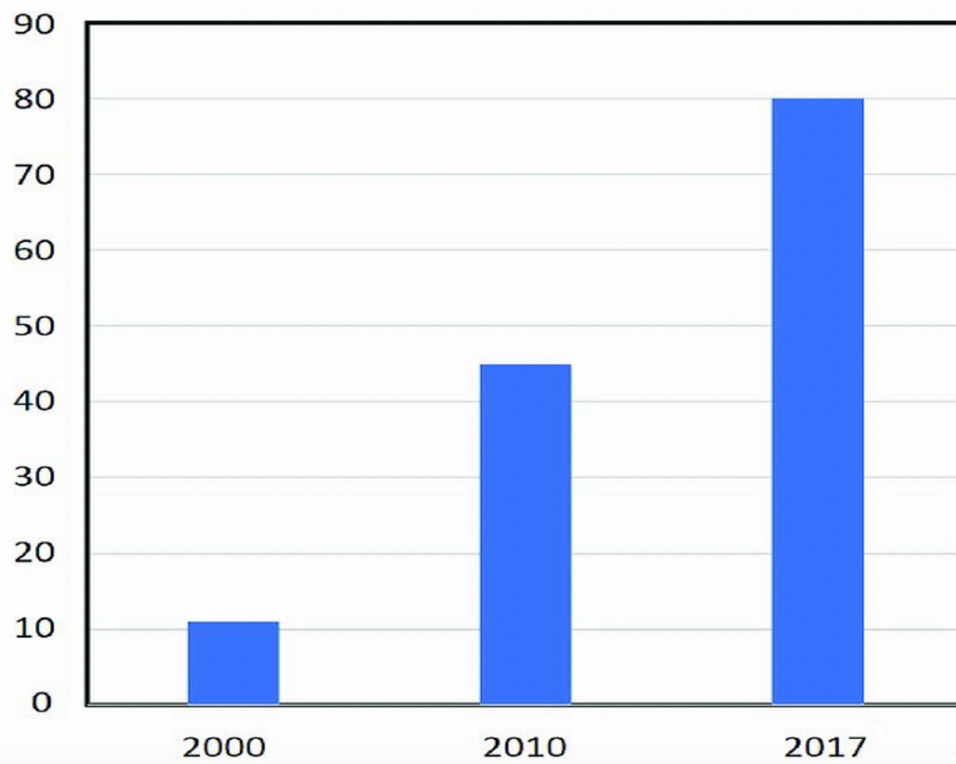

**Supporting Figure S4.** Evolution of mycorrhizal producing and marketing firm in Europe from 2010 to 2017. Adapted from [Keswani et al., 2018](#).

**Supporting Table S2:** Effect of Commercial Inoculants in Greenhouse and Field trials.

| Commercial inoculants                                        | AMF species                                                                                                                                                                                                                                                                                                                                     | Study conditions, country  | Dosage applied | Crops   | Effect of inoculants                                                                                                            | Ref. |
|--------------------------------------------------------------|-------------------------------------------------------------------------------------------------------------------------------------------------------------------------------------------------------------------------------------------------------------------------------------------------------------------------------------------------|----------------------------|----------------|---------|---------------------------------------------------------------------------------------------------------------------------------|------|
| Myco Apply Soluble Endo MYCORRHIZAL APPLICATIONS, INC. (USA) | <i>G. intraradices</i> , <i>G. mosseae</i> , <i>G. aggregatum</i> and <i>G. etunicatum</i> , <i>G. intraradices</i> , <i>G. mosseae</i> , <i>G. aggregatum</i> , <i>G. monosporum</i> , <i>G. cralum</i> , <i>G. deserticola</i> , <i>Gi. margarita</i> , <i>Gi. brasilianum</i> ,                                                              | Greenhouse Kenya           | Not specified  | Soybean | Increased root colonization                                                                                                     | [1]  |
| Myco Apply Endo plus MYCORRHIZAL APPLICATIONS, INC. (USA)    | <i>G. intraradices</i> , <i>G. mosseae</i> , <i>G. aggregatum</i> and <i>G. etunicatum</i> , <i>Trichoderma konigii</i> and <i>T. harzianum</i><br><i>G. intraradices</i> , <i>G. mosseae</i> , <i>G. aggregatum</i> , <i>G. etunicatum</i> , <i>Rhizopogon villosullus</i> , <i>R. luteolus</i> , <i>R. amyopogon</i> , <i>R. fulvogleba</i> , | Greenhouse Kenya           | Not specified  | Soybean | Increased root colonization                                                                                                     | [1]  |
| Myco Apply e Endo MYCORRHIZAL APPLICATIONS, INC. (USA)       | <i>G. intraradices</i> , <i>G. mosseae</i> , <i>G. aggregatum</i> and <i>G. etunicatum</i>                                                                                                                                                                                                                                                      | Greenhouse Kenya           | Not specified  | Soybean | Increased root colonization                                                                                                     | [1]  |
| Myco Apply Root Dip Gel MYCORRHIZAL APPLICATIONS, INC. (USA) | <i>Gi. etunicatum</i> , <i>R. vilosullus</i> , <i>R. lutelolus</i> , <i>R. amylopogon</i> , <i>R. fulvogleba</i> , <i>Pisolithus tinctorius</i> , <i>Scleroderma Cepa</i> , <i>S. cirtrinum propagules</i>                                                                                                                                      | Greenhouse Kenya           | Not specified  | Soybean | Increased root colonization                                                                                                     | [1]  |
| Endorhize standard, AGRAUXINE (France)                       | <i>Glomus spp.</i>                                                                                                                                                                                                                                                                                                                              | Greenhouse Kenya           | Not specified  | Soybean | Increased root colonization                                                                                                     | [1]  |
| Endorhize premium AGRAUXINE (France)                         | <i>Glomus spp.</i>                                                                                                                                                                                                                                                                                                                              | Greenhouse and Field Kenya | Not specified  | Soybean | Increased root colonization in the Greenhouse<br>Enhanced nodulation in the field<br>No significant yield increase in the field | [1]  |
| Mycor IFTECH (France)                                        | <i>Glomus intraradices</i>                                                                                                                                                                                                                                                                                                                      | Greenhouse Kenya           | Not specified  | Soybean | Increased root colonization                                                                                                     | [1]  |
| Vam-Tech NUTRI-TECH SOLUTIONS P/L (Australia)                | <i>Glomus intraradices</i>                                                                                                                                                                                                                                                                                                                      | Greenhouse Kenya           | Not specified  | Soybean | Increased root colonization                                                                                                     | [1]  |
| Myco Apply Endo MYCORRHIZAL APPLICATIONS, INC. (USA)         | <i>G. intraradices</i> , <i>G. mosseae</i> , <i>G. aggregatum</i> and <i>G. Etunicatum</i>                                                                                                                                                                                                                                                      | Greenhouse Kenya           | Not specified  | Soybean | Increased root colonization                                                                                                     | [1]  |

|                                                                        |                                                                                                             |                                    |               |                      |                                                                                                                                            |     |
|------------------------------------------------------------------------|-------------------------------------------------------------------------------------------------------------|------------------------------------|---------------|----------------------|--------------------------------------------------------------------------------------------------------------------------------------------|-----|
| Rhizatech<br>DUDUTECH (K) LTD.<br>(Kenya)                              | <i>Spores and mycelial fragments of AMF<br/>(mainly G. intraradices)</i>                                    | Greenhouse<br>and Field<br>Kenya   | Not specified | Soybean              | Increased root colonization in the<br>Greenhouse<br>Enhanced nodulation in the field<br>No significant yield increase in the<br>field      | [1] |
| Zander Mycorrhiza<br>ZANDER MIDDLE EAST<br>LLC, (United Arab Emirates) | Beneficial arbuscular mycorrhizal<br>fungi from arid zones                                                  | Greenhouse<br>Kenya                | Not specified | Soybean              | Increased root colonization                                                                                                                | [1] |
| MycoUp, MycoUp Activ,<br>Resid HC and Resid MG<br>SYMBORG INC.[2]      | <i>Glomus iranicum var. tenuihypharum</i>                                                                   | Greenhouse<br>and Field<br>Spain   | 3 kg/ha       | Lettuce and<br>grape | Increased biomass for lettuce under<br>greenhouse,<br>improved fruit cluster weight, color<br>uniformity and brix in grape in the<br>field | [3] |
| MYKE® PRO Potato-L<br>PREMIER TECH<br>BIOTECHNOLOGIES<br>(Canada)      | <i>Glomus intraradices</i> DAOM 197198                                                                      | Field                              | 238 ml/ha     | Irish Potato         | Increased root colonization and<br>yield                                                                                                   | [4] |
| MYKE® PRO SG2<br>PREMIER TECH<br>BIOTECHNOLOGIES<br>(Canada)           | <i>Glomus intraradices</i>                                                                                  | Greenhouse<br>Canada               | 16 g/3L pot   | Maize                | Increased root colonization and<br>yield under disturbed soil                                                                              | [5] |
| MYKE® PRO GR<br>PREMIER TECH INC.<br>(Canada)                          | <i>Glomus intraradices</i>                                                                                  | Green house<br>and Field<br>Canada | 15g/7.6L pot  | Grapevine Rootstocks | Increased biomass production in<br>Greenhouse<br>Increased root colonization but no<br>effect on biomass in the field                      | [6] |
| AEGIS®<br>ITALPOLLINA (Italy)                                          | <i>Glomus intraradices</i>                                                                                  | Field<br>Italy                     | 25 kg ha      | Maize                | Increased root colonization, yield<br>and leaf biomass                                                                                     | [7] |
| Rootella BR<br>GROUNDWORK BIOAG<br>(Israel)                            | <i>Glomus intraradices</i>                                                                                  | Field<br>Brazil                    | 1 kg/ha       | Maize                | Increased corn biomass and grain<br>yield under varying P concentration                                                                    | [8] |
| Product name not specified by<br>author<br>SYMBIOM<br>(Czech republic) | <i>Claroideoglomus sp.,<br/>Funneliformis sp., Diversispora sp.,<br/>Glomus sp. and Rhizophagus<br/>sp.</i> | Greenhouse<br>China                | 10g/pot       | Cucumber             | Increased root colonization,<br>increased plant height and dry<br>weight, nutrient composition micro<br>and macro                          | [9] |
| Product name not specified by<br>author<br>SYMBIOM (Czech Republic)    | <i>G. intradices, G. microageregatum</i> BEG<br>and <i>G. Claroideum</i> BEG 210                            | Greenhouse<br>China                | 10g/pot       | Cucumber             | Increased root colonization, plant<br>height and dry weigh, mineral<br>composition                                                         | [9] |

|                                                                |                                                                                                                                                                                                                                                                                                                                                                                              |                                                      |                                        |                                                                                                                                                                                |                                                                                                                                              |      |
|----------------------------------------------------------------|----------------------------------------------------------------------------------------------------------------------------------------------------------------------------------------------------------------------------------------------------------------------------------------------------------------------------------------------------------------------------------------------|------------------------------------------------------|----------------------------------------|--------------------------------------------------------------------------------------------------------------------------------------------------------------------------------|----------------------------------------------------------------------------------------------------------------------------------------------|------|
| Micosat F<br>CCS S.R.L. AOSTA (Italy)                          | <i>Funneliformis coronatum</i> GO01 and<br>GU53, <i>Funneliformis caledonium</i><br>GM24, <i>Rhizophagus intraradices</i><br>GB67 and GG32, <i>Funneliformis</i><br><i>mosseae</i> GP11 and GC11, and<br><i>Septoglomus viscosum</i> GC41), and<br>three fungal saprotrophs ( <i>Beauveria</i><br>spp. BB48, <i>Trichoderma harzianum</i><br>TH01, and <i>Trichoderma atroviride</i><br>TA28 | Field<br>Italy                                       | 10kg/ha                                | Maize                                                                                                                                                                          | No inoculation, reduced dominance<br>of local species, increased diversity<br>of AMF community                                               | [10] |
| Panoramix<br>Koppert Biological Systems,<br>(The Netherlands), | <i>Consortium of AMF, PGPR, Bacillus sp.</i><br>and <i>Trichoderma</i>                                                                                                                                                                                                                                                                                                                       | Greenhouse<br>Italy                                  | Seed coating,<br>rate not<br>available | <i>Dactylis glomerata</i> L. and<br>mix of stand of grasses<br>( <i>Lolium perenne</i> L., <i>Poa</i><br><i>pratensis</i> L. and <i>Festuca</i><br><i>arundinacea</i> Shreb.). | Increased biomass, N uptake, reduce<br>bioavailability of Cadmium,<br>enhanced soil nitrogen fixing and<br>ammonia and<br>oxidizing bacteria | [11] |
| Mycogrowth<br>SYMBORG                                          | <i>Glomus iranicum var tenuihypharum</i>                                                                                                                                                                                                                                                                                                                                                     | Soilless<br>growing<br>system<br>under<br>Greenhouse | 3kg/ha                                 | Strawberry                                                                                                                                                                     | Increased root colonization, and<br>improve fruit quality by increasing<br>content of anthocyanin and total<br>phenolics                     | [12] |

## References.

1. Faye, A., et al., *Testing of commercial inoculants to enhance P Uptake and grain yield of promiscuous soybean in Kenya*. Sustainability, 2020. **12**(3803): p. 1-15.
2. Barker, S.J., et al., *A mutant in Lycopersicon esculentum Mill. with highly reduced VA mycorrhizal colonization: Isolation and preliminary characterisation*. Plant Journal, 1998. **15**(6): p. 791-797.
3. Félix Fernández, M., et al., *Application of Arbuscular Mycorrhizae Glomus iranicum var. tenuihypharum var. nova in Intensive Agriculture: A Study Case*. Journal of Agricultural Science and Technology B, 2017. **7**(4).
4. Hijri, M., *Analysis of a large dataset of mycorrhiza inoculation field trials on potato shows highly significant increases in yield*. Mycorrhiza, 2016. **26**(3): p. 209-14.
5. Antunes, P., et al., *Influence of commercial inoculation with Glomus intraradices on the structure and functioning of an AM fungal community from an agricultural site*. Plant and Soil, 2009. **317**: p. 257-266.
6. Rosa, D., et al., *Performance and Establishment of a Commercial Mycorrhizal Inoculant in Viticulture*. Agriculture, 2020. **10**(11).
7. Cozzolino, V., V. Di Meo, and A. Piccolo, *Impact of arbuscular mycorrhizal fungi applications on maize production and soil phosphorus availability*. Journal of Geochemical Exploration 2013. **129**: p. 40–44.
8. Stoffel, S.C.G., et al., *Yield increase of corn inoculated with a commercial arbuscular mycorrhizal inoculant in Brazil*. Ciência Rural, 2020. **50**(7).
9. Chen, S., et al., *Combined Inoculation with Multiple Arbuscular Mycorrhizal Fungi Improves Growth, Nutrient Uptake and Photosynthesis in Cucumber Seedlings*. Front Microbiol, 2017. **8**: p. 2516.
10. Berruti, A., E. Lumini, and V. Bianciotto, *AMF components from a microbial inoculum fail to colonize roots and lack soil persistence in an arable maize field*. Symbiosis, 2017. **72**: p. 73–80.
11. Visconti, D., et al., *Securing of an Industrial Soil Using Turfgrass Assisted by Biostimulants and Compost Amendment*. Agronomy, 2020. **10**(9).
12. Cecatto, A.P., et al., *Mycorrhizal inoculation affects the phytochemical content in strawberry fruits*. Acta Scientiarum. Agronomy, 2016. **38**(2).
